# Supplementary material for: Expanding 3D geometry for enhanced on-chip microbubble production and single step formation of liposome modified microbubbles
Source: Royal Society of Chemistry journal article supplement (doi:10.1039/c2lc40634a), 2012-01-01

**Supplementary figure** a) Measurement of the contact angle of the gas bulb as it enters the nozzle of the device. b) graph showing the relationship of the contact angle and the concentration of MBs against varying liquid flow rate.

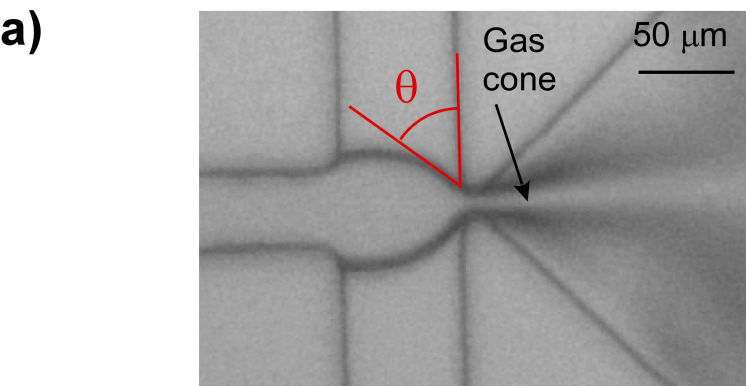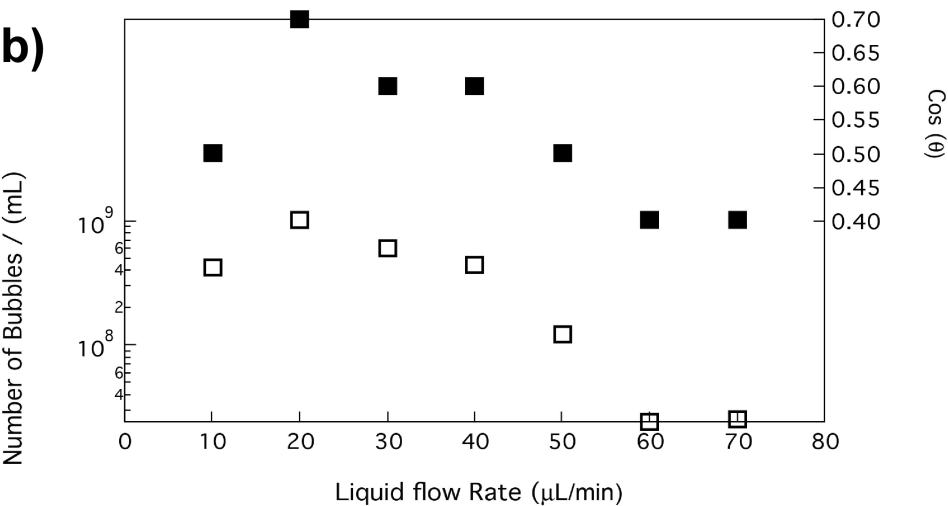

Supplement: c2lc40634a.pdf [file c2lc40634a.pdf]
